# Supplementary material for: Towards furfural and biomass char production from Camellia oleifera husks using dilute hydrochloric acid pretreatment: a comprehensive investigation on adsorption performance
Source: Royal Society of Chemistry journal article supplement (doi:10.1039/d3su00181d), 2023-01-01
Supplement: d3su00181d1.pdf [file d3su00181d1.pdf]

1  
2  
3  
4  
5  
6  
7  
8  
9  
10  
11  
12  
13  
14  
15  
16  
17  
18  
19  
20  
21  
22

## Supplementary material

### **Towards Furfural and Biomass Char Production from *Camellia oleifera* Husks using Dilute Hydrochloric Acid Pretreatment: A Comprehensive Investigation on Adsorption Performance**

Mingyang Hu, Yanyan Yu, Xiaoyan Li, Xinyu Wang, Yun Liu\*

(Beijing Key Laboratory of Bioprocess, College of Life Science and Technology,  
Beijing University of Chemical Technology, Beijing 100029, China)

---

\*Corresponding author: [liuyun@mail.buct.edu.cn](mailto:liuyun@mail.buct.edu.cn) or [liuyunprivate@sina.com](mailto:liuyunprivate@sina.com)

Fax: +86-010-64416428; Tel: +86-010-64421335.

23

## Figures and Tables captions

24 Fig. S1. Dilute HA recovery and recycling experiment.

25 Fig. S2. Desorption of FF with different solvents of methanol, ethanol,  
26 dichloromethane, 2-Me-THF, and acetone.

27 Fig. S3. the adsorption capacity of the regenerated S-8 macroporous resin after 5  
28 batch recyclings.

29 Table S1. Properties of S-8 macroporous resin.

30 Table S2. Adsorption kinetic parameters of FF adsorbed on S-8 macroporous resin.

31 Table S3. Thermodynamic parameters of adsorption of FF on S-8 macroporous resin.

32 Table S4. Adsorption kinetic parameters for MB dye adsorption on BC.

33 Table S5. Thermodynamic parameters for the adsorption of MB dye on BC.

34 Table S6. Characteristics of biomass char (BC) used in our work and coconut  
35 activated carbon (CAC) reported in the literature .

36

37 Fig. S1

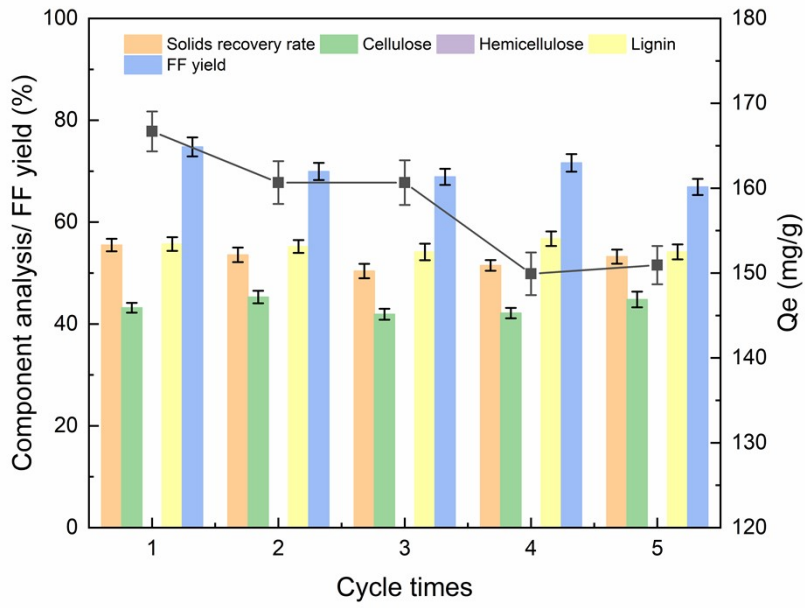

38

39 Fig. S2

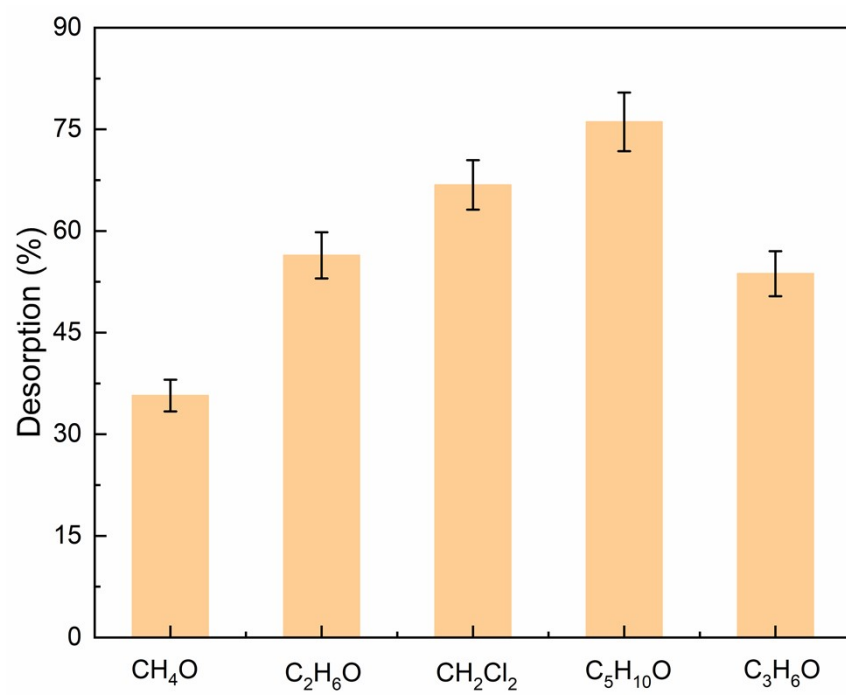

40

41 Fig. S3

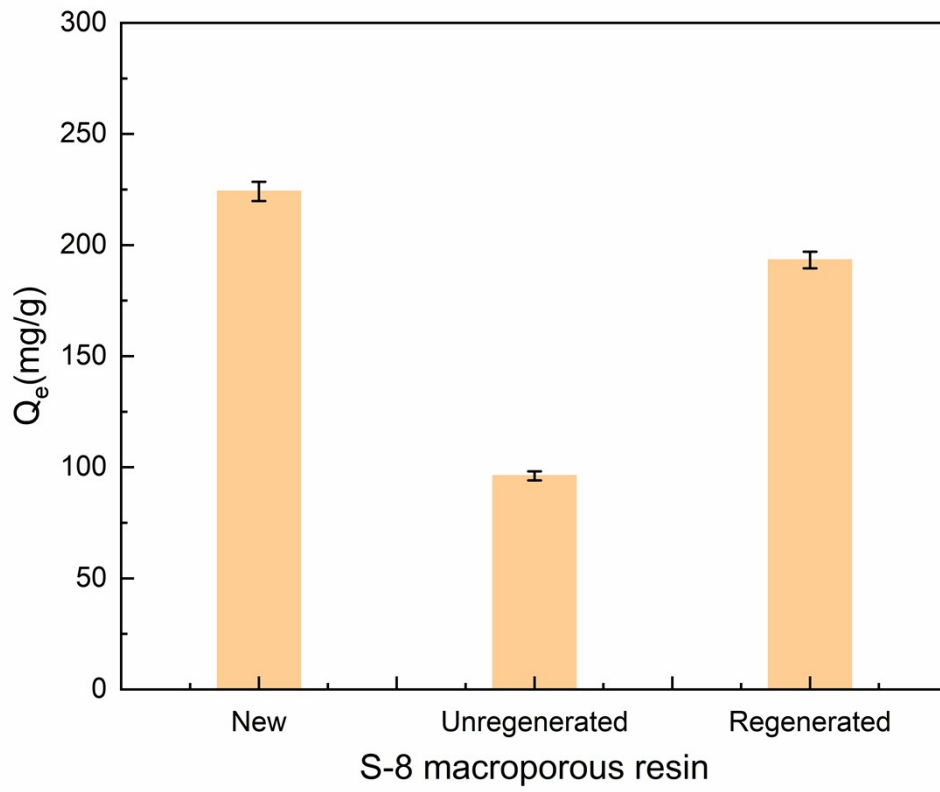

42

43 **Table S1**

| Properties            | Range                     |
|-----------------------|---------------------------|
| Particle size range   | 0.3-1.25 mm               |
| Water content         | 66-72 %                   |
| Specific surface area | 100-120 m <sup>2</sup> /g |
| Wet vacuum density    | 1.0-1.06 g/ml             |
| Wet apparent density  | 0.6-0.7 g/ml              |

44

45 **Table S2**

| Pseudo-first-order    |                        |                | Pseudo-second-order   |                        |                |
|-----------------------|------------------------|----------------|-----------------------|------------------------|----------------|
| Q <sub>1</sub> (mg/g) | K <sub>1</sub> (1/min) | R <sup>2</sup> | Q <sub>2</sub> (mg/g) | K <sub>2</sub> (1/min) | R <sup>2</sup> |
| 30.57                 | 0.125                  | 0.999          | 209.21                | 0.0087                 | 0.999          |

46

47 **Table S3**

| R <sup>2</sup> | $\Delta H$                         | $\Delta S$                        | $\Delta G/(\text{kJ}\cdot\text{mol}^{-1})$ |        |        |        |        |
|----------------|------------------------------------|-----------------------------------|--------------------------------------------|--------|--------|--------|--------|
|                | $/(\text{kJ}\cdot\text{mol}^{-1})$ | $/(\text{J}\cdot\text{mol}^{-1})$ | 293K                                       | 303K   | 313K   | 323K   | 333K   |
| 0.991          | -7.649                             | 0.632                             | -7.820                                     | -7.860 | -7.807 | -7.841 | -7.890 |



49 **Table S4**

| Pseudo-first-order    |                |                | Pseudo-second-order      |                |                |
|-----------------------|----------------|----------------|--------------------------|----------------|----------------|
| Q <sub>1</sub> (mg/g) | K <sub>1</sub> | R <sup>2</sup> | Q <sub>2</sub><br>(mg/g) | K <sub>2</sub> | R <sup>2</sup> |
| 82.86                 | 0.069          | 0.998          | 95.68                    | 0.000896       | 0.989          |

51 **Table S5**

| R <sup>2</sup> | $\Delta H$<br>/ (kJ·mol <sup>-1</sup> ) | $\Delta S$<br>/ (J·mol <sup>-1</sup> ) | $\Delta G$ /(kJ·mol <sup>-1</sup> ) |        |        |        |        |
|----------------|-----------------------------------------|----------------------------------------|-------------------------------------|--------|--------|--------|--------|
|                |                                         |                                        | 293K                                | 303K   | 313K   | 323K   | 333K   |
| 0.987          | 37.25                                   | 168.11                                 | -11.91                              | -13.93 | -15.53 | -16.97 | -18.63 |

52

53 **Table S6**

| Characteristic                          | BC in our work | CAC in the literature |
|-----------------------------------------|----------------|-----------------------|
| Surface area (m <sup>2</sup> /g)        | 1134.619       | 645                   |
| Average pore Diameter (nm)              | 1.811          | 1.60                  |
| Total pore volume (cm <sup>3</sup> /g)  | 0.514          | 0.26                  |
| Microporous volume (cm <sup>3</sup> /g) | 0.447          | 0.25                  |
| Mesoporous volume (cm <sup>3</sup> /g)  | 0.067          | 0.01                  |

54
